# Supplementary material for: Cryptococcus neoformans Iron-Sulfur Protein Biogenesis Machinery Is a Novel Layer of Protection against Cu Stress
Source: PubMed Central journal article supplement (PMC5666163; doi:10.1128/mbio.01742-17), 2017-10-31
Supplement: mbo005173572s1.pdf [file mbo005173572s1.pdf]

1 **SUPPLEMENTAL MATERIALS AND METHODS**

2

3 **Includes Supplemental Materials and Methods and Table S1. List of strains used**  
4 **in this study, Table S2. List of plasmids used in this study, and Table S3. List of**  
5 **plasmids used in this study.**

6

7 **Generation of *Cryptococcus neoformans* mutants**

8 YPD, supplemented with 1.5% agar and 100 µg ml<sup>-1</sup> of nourseothricin (NAT), 200 µg  
9 ml<sup>-1</sup> of neomycin (G418) or 200 u ml<sup>-1</sup> of hygromycin B (HYG) was used for colony  
10 selection after biolistic transformation.

11

12 The *C. neoformans* Atm1-F strains (wimp and stud) (DTY947 and DTY967,  
13 respectively) were generated as follows: the multiple cloning site of pSL1180  
14 (Amersham) was amplified with the primer pair OLSG-49 and OLSG-50 (primers  
15 sequences are described in Table S2), and HindIII/EcoRI cloned into pUC19 to yield  
16 plasmid pDT1799. The NAT cassette from pAI3 (1) was amplified with the primer pair  
17 OLSG-35 and OLSG-36 and NheI cloned into DTP1799 to generate the plasmid  
18 pDT1800. The 4FLAG-HOG1 terminator sequence was amplified from plasmid p553  
19 (gift from Dr. Sun-Bahn, Yonsei University, Seoul) with the primer pair OLSG-158 and  
20 OLSG-107 and cloned into pDT1800 with the restriction sites SacII/StuI to generate the  
21 plasmid pDT1802. The primer pair OLSG-196 and OLSG-197 was used to amplify

22 approximately 1kb upstream of the stop codon (not including the stop codon) of *ATM1*  
23 (*ATM1up*) using genomic DNA as a template. This fragment was digested with *Ascl* and  
24 cloned into pDT1801 to generate the plasmid pDT1802. The primer pair OLSG-93 and  
25 OLSG-94 was used to amplify approximately 1kb downstream of the stop codon (not  
26 including the stop codon) of *ATM1* (*ATM1d*) using genomic DNA as a template. This  
27 fragment was digested with *XmaI* and cloned into pDT1802 to generate the plasmid  
28 pDT1803. A PCR product, including the sequence *ATM1up-4FLAG-HOGt-NAT-ATM1d*  
29 was obtained with the primer pairs OLSG-276 and OLSG-54, using the plasmid  
30 pDT1803 as a template, and transformed in *C. neoformans* strains H99 wimp (DTY758)  
31 and H99 stud (DTY981) by biolistic transformation, to generate the strains DTY947 and  
32 DTY967, as previously described.

33

34 The *C. neoformans* strains Gal7-Atm1-F wimp and stud (DTY949 and DTY969,  
35 respectively) strains were generated as follows: the G418 cassette from pJAF1 (2) was  
36 amplified with the primer pair OLSG-112 and OLSG-113 and *NheI* cloned into pDT1799  
37 to generate the plasmid pDT1804. A fragment of approximately 1kb was amplified from  
38 the genomic DNA using OLSG-294 and OLSG-295 as a primer pair. This fragment was  
39 cut with the restriction enzymes *SacII* and *StuI*, and cloned into pDT1804 to generate  
40 the plasmid pDT1805. A PCR product amplifying the *GAL7* promoter was obtained with  
41 OLSG-297 and OLSG-298, using pCN69 as a template, a second PCR product, with  
42 size approximately 1kb, and starting at the *ATM1* initiation codon, was obtained with the  
43 primer pair OLSG-298 and OLSG-299 using genomic DNA as a template. These two  
44 PCR products were cloned into pDT1805 using the infusion cloning kit (Clontech

45 Laboratories) to generate the plasmid pDT1806. The plasmid was linearized with SacII,  
46 and transformed in both *C. neoformans* DTY947 to generate the strain DTY949, and in  
47 *C. neoformans* DTY967 to generate the strain DTY969, by biolistic transformation.

48

49 The *C. neoformans* strain Gal7-Atm1-mCherry (DTY951) strain was generated  
50 according to the following steps: the mCherry-HOGt sequence was amplified from p524  
51 (gift from Dr. Sun-Bahn) with OLSG-194 and OLSG-195, and cloned after digestion with  
52 the restriction enzymes SacII/NgoMIV into pDT1800. The primer pair OLSG-196 and  
53 OLSG-197 was used to amplify approximately 1kb upstream of the stop codon (not  
54 including the stop codon) of *ATM1* (ATM1up) using genomic DNA as a template. This  
55 fragment was digested with Ascl and cloned into pDT1807 to generate the plasmid  
56 pDT1808. The primer pair OLSG-93 and OLSG-94 was used to amplify approximately  
57 1kb downstream of the stop codon (not including the stop codon) of *ATM1* (ATM1d)  
58 using genomic DNA as a template. This fragment was digested with Xmal and cloned  
59 into pDT1808 to generate the plasmid pDT1809. A PCR product, including the  
60 sequence ATM1up-mCherry-HOGt-NAT-ATM1d was obtained with the primer pairs  
61 OLSG-276 and OLSG-277 and transformed in *C. neoformans* strain H99 (DTY758) by  
62 biolistic transformation to generate the strain ATM1-mCherry. A maxiprep for pDT1806  
63 was obtained, the plasmid was linearized with SacII, and transformed in Atm1-mCherry  
64 by biolistic transformation, to generate the Gal7-Atm1-mCherry strain.

65

66 *C. neoformans* Atm1-F Rli1-HA (DTY955) and Gal7-Atm1-F Rli1-HA (DTY957) strains  
67 were generated as follows: the primer pair OLSG-190 and OLSG-191 was used to  
68 amplify the *HYG* cassette from the pHYG-KB1 vector (3), the PCR fragment obtained  
69 was digested with KpnI and cloned into pDT1799 to generate the pDT1810 vector. The  
70 Rli1-HA-Hog terminator sequence, including a SbfI site between the RLI1 sequence and  
71 the HA, was synthesized by Integrated DNA Technologies (IDT), this sequence was  
72 amplified with OLSG-358 and OLSG-107 and digested with the restriction enzymes  
73 XhoI/StuI for cloning it into pDT1810 vector, to generate the pDT1811 vector. A PCR  
74 fragment, approximately 1kb downstream of the stop codon (and not including the stop  
75 codon) was amplified with OLSG-359 and OLSG-360 and cloned into pDT1811 after  
76 digestion with XmaI/XbaI to generate the vector pDT1812. A maxiprep of pDT1812 was  
77 obtained, and the harvested plasmid was digested with XhoI for linearization before  
78 biolistic transformation in both DTY947 to obtain the strain Atm1-F Rli1-HA (DTY955)  
79 and in DTY949 to obtain the strain Gal7-Atm1-F Rli1-HA (DTY957).

80

81 *C. neoformans* Atm1-F Leu1-HA (DTY959) and Gal7-Atm1-F Leu1-HA (DTY961) strains  
82 were generated as follows: the primer pair OLSG-412 and OLSG-413 was used to  
83 amplify approximately 1kb upstream the *LEU1* stop codon (without including it), the  
84 PCR product obtained was digested with SpeI/SbfI and cloned into pDT1811 SpeI/SbfI  
85 digested to yield the vector pDT1813. A PCR fragment, approximately 1kb downstream  
86 of the stop codon (and not including the stop codon) was amplified with OLSG-414 and  
87 OLSG-415 and cloned into DTP1813 after digestion with XbaI/BamHI to generate the  
88 vector pDT1814. A PCR product was obtained by amplifying the sequence LEU1up-HA-

89 HOGt-HYG-LEU1d with OLSG-434 and OLSG-54 and transformed in both DTY947 to  
90 obtain the strain Atm1-F Leu1-HA (DTY959) and in DTY949 to obtain the strain Gal7-  
91 Atm1-F Leu1-HA (DTY961).

92

93 *C. neoformans* Atm1-F Lys4-HA (DTY963) and Gal7-Atm1-F Lys4-HA (DTY965) strains  
94 were generated as follows: the primer pair OLSG-445 and OLSG-446 was used to  
95 amplify approximately 1kb upstream the *LYS4* stop codon (without including it), the  
96 PCR product obtained was cloned with the infusion kit (Clontech Laboratories) into  
97 DTP1811 *SpeI/SbfI* digested to yield the vector pDT1815. A PCR fragment,  
98 approximately 1kb downstream of the stop codon (and not including the stop codon)  
99 was amplified with OLSG-447 and OLSG-448 and cloned into pDT1815 after digestion  
100 with *XbaI/BamHI* to generate the vector pDT1816. A PCR product was obtained by  
101 amplifying the sequence LYS4up-HA-HOGt-HYG-LYS4d with OLSG-465 and OLSG-54  
102 and transformed in both DTY947 to obtain the strain Atm1-F Lys4-HA (DTY963) and in  
103 DTY949 to obtain the strain Gal7-Atm1-F Lys4-HA (DTY965). Primers are described in  
104 Table S3.

105

106

107

108 **REFERENCES TO THE SUPPLEMENTAL MATERIALS AND METHODS**

109

- 110 1. Idnurm A, Reedy JL, Nussbaum JC, Heitman J. 2004. *Cryptococcus neoformans*  
111 virulence gene discovery through insertional mutagenesis. *Eukaryot Cell* 3:420-9.
- 112 2. Fraser JA, Subaran RL, Nichols CB, Heitman J. 2003. Recapitulation of the sexual cycle  
113 of the primary fungal pathogen *Cryptococcus neoformans* var. *gattii*: implications for an  
114 outbreak on Vancouver Island, Canada. *Eukaryot Cell* 2:1036-45.
- 115 3. Hua J, Meyer JD, Lodge JK. 2000. Development of positive selectable markers for the  
116 fungal pathogen *Cryptococcus neoformans*. *Clin Diagn Lab Immunol* 7:125-8.

117

118

**Table S1.** List of strains used in this study

| NAME   | YEAST                | STRAIN                            | GENOTYPE                                                                                   | REFERENCE                                       |
|--------|----------------------|-----------------------------------|--------------------------------------------------------------------------------------------|-------------------------------------------------|
| DTY758 | <i>C. neoformans</i> | H99                               | wild-type wimp                                                                             | J. Heitman lab, Duke University, USA            |
| DTY981 | <i>C. neoformans</i> | H99                               | wild-type stud                                                                             | J. Heitman lab, Duke University, USA            |
| DTY761 | <i>C. neoformans</i> | $\Delta Cuf1$                     | <i>cuf1::Neo</i> wimp                                                                      | (1)                                             |
| DTY762 | <i>C. neoformans</i> | $\Delta Cuf1$ + pCuf1-FLAG        | <i>cuf1::Neo/CUF1-FLAG::HYG</i> wimp                                                       | (2)                                             |
| DTY947 | <i>C. neoformans</i> | Atm1-F                            | <i>ATM1-4FLAG::NAT</i> wimp                                                                | This study, derived from DTY758                 |
| DTY949 | <i>C. neoformans</i> | Gal7-Atm1-F                       | <i>ATM1p::GAL7p::G418 ATM1-4FLAG::NAT</i> wimp isolate #1                                  | This study, derived from DTY947                 |
| DTY949 | <i>C. neoformans</i> | Gal7-Atm1-F                       | <i>ATM1p::GAL7p::G418 ATM1-4FLAG::NAT</i> wimp isolate #2                                  | This study, derived from DTY947                 |
| DTY951 | <i>C. neoformans</i> | Gal7-Atm1-mCherry                 | <i>ATM1p::GAL7p::G418 ATM1-mCherry::NAT</i> wimp                                           | This study                                      |
| DTY756 | <i>C. neoformans</i> | $\Delta Mt1 \Delta Mt2$           | <i>mt1::NAT mt2::NEO</i> wimp                                                              | (1)                                             |
| DTY953 | <i>C. neoformans</i> | $\Delta Mt1 \Delta Mt2$ Gal7-Atm1 | <i>mt1::NAT mt2::NEO ATM1p::GAL7p::G418</i> wimp                                           | This study, derived from DTY756                 |
| DTY955 | <i>C. neoformans</i> | Atm1-F Rli1-HA                    | <i>ATM1-4FLAG::NAT RLI1-HA::HYG</i> wimp                                                   | This study, derived from DTY947                 |
| DTY957 | <i>C. neoformans</i> | Gal7-Atm1-F Rli1-HA               | <i>ATM1p::GAL7p::G418 ATM1-4FLAG::NAT RLI1-HA::HYG</i> wimp                                | This study, derived from DTY949                 |
| DTY959 | <i>C. neoformans</i> | Atm1-F Leu1-HA                    | <i>ATM1-4FLAG::NAT LEU1-HA::HYG</i> wimp                                                   | This study, derived from DTY947                 |
| DTY961 | <i>C. neoformans</i> | Gal7-Atm1-F Leu1-HA               | <i>ATM1p::GAL7p::G418 ATM1-4FLAG::NAT LEU1-HA::HYG</i> wimp                                | This study, derived from DTY949                 |
| DTY963 | <i>C. neoformans</i> | Atm1-F Lys4-HA                    | <i>ATM1-4FLAG::NAT LYS4-HA::HYG</i> wimp                                                   | This study, derived from DTY947                 |
| DTY965 | <i>C. neoformans</i> | Gal7-Atm1-F Lys4-HA               | <i>ATM1p::GAL7p::G418 ATM1-4FLAG::NAT LYS4-HA::HYG</i> wimp                                | This study, derived from DTY949                 |
| DTY967 | <i>C. neoformans</i> | Atm1-F                            | <i>ATM1-4FLAG::NAT</i> stud                                                                | This study, derived from DTY946                 |
| DTY969 | <i>C. neoformans</i> | Gal7-Atm1-F                       | <i>ATM1p::GAL7p::G418 ATM1-4FLAG::NAT</i> stud                                             | This study, derived from DTY946                 |
|        | <i>S. cerevisiae</i> | GalL-Atm1                         | <i>MATa, ura3-1, ade2-1, trp1-1, his3-11,15 leu2-3,112 ATM1p::GalLp</i>                    | (3)                                             |
|        | <i>S. cerevisiae</i> | GalL-Atm1 Aft1-lux                | <i>MATa, ura3-1, ade2-1, trp1-1, his3-11,15 leu2-3,112 ATM1p::GalLp AFT1::HIS3 AFT1lux</i> | Dr U. Muehlenhoff, Philipps-Universitat Marburg |
|        | <i>S. cerevisiae</i> | Grx4-HA                           | <i>MATa, ura3-1, ade2-1, trp1-1, his3-11,15 leu2-3,112::GRX4-HA tetO2</i> promoter         | (4)                                             |

## REFERENCES

- (1) Ding C. et al. (2011) The Copper regulon of the human fungal pathogen *Cryptococcus neoformans* H99. *Molecular Microbiology* 81(6), 1560-1576
- (2) Ding C. et al. (2013) *Cryptococcus neoformans* copper detoxification machinery is critical for fungal virulence. *Cell Host and Microbe* 13, 265-276
- (3) Srinivasan V, et al. (2014) Crystal structures of nucleotide-free and glutathione-bound mitochondrial ABC transporter Atm1. *Science* 343(6175):1137-40
- (4) Molina MM et al. (2004) Nuclear monothiol glutaredoxins of *Saccharomyces cerevisiae* can function as mitochondrial glutaredoxins. *J Biol Chem* 279(50):51923-30

**Table S2.** List of plasmids used in this study

| <b>PLASMID</b>   | <b>ORF</b>                                                   | <b>BACKBONE</b> | <b>REFERENCE</b>                    |
|------------------|--------------------------------------------------------------|-----------------|-------------------------------------|
| pRS416-NP-ScAtm1 | ScATM1, MET25 promoter replaced by ATM1p                     | pRS416-MET25    | (1)                                 |
| p416-pGPD-CnAtm1 | <i>C. neoformans</i> ATM1 cDNA under control of GPD promoter | p416-GPD        | This work                           |
| p416-pCCC1-LUX   | luc2 under control of CCC1 (-600 to -1)                      | p416-Luc2       | (2)                                 |
| p426-FDX2-HA     | FDX2 (Homo sapiens); C-terminal HA                           | p426-TDH3       | (3)                                 |
| p426-NAR1-HA     | NAR1, C-terminal HA                                          | p426-TDH3       | (4)                                 |
| p424-NBP35-TAP   | NBP35, C-terminal TAP                                        | p424-TDH3       | (5)                                 |
| p426-RLI1-HA     | RLI1; C-terminal HA; own promoter replacing TDH3 promoter    | p426-TDH3       | (6)                                 |
| p414-SDH2-Myc    | SDH2; C-terminal Myc                                         | p414-MET25      | D.R. Winge, University of Utah, USA |
| p416-SDH1        | SDH1                                                         | p416-MET25      | D.R.Winge, University of Utah, USA  |

**REFERENCES**

- (1) Srinivasan V, et al. (2014) Crystal structures of nucleotide-free and glutathione-bound mitochondrial ABC transporter Atm1. *Science*, 343(6175):1137-40
- (2) Rietzschel N, et al. (2015) The Basic Leucine Zipper Stress Response Regulator Yap5 Senses High-Iron Conditions by Coordination of [2Fe-2S] Clusters. *Mol Cell Biol* 35(2):370-8
- (3) Sheftel AD, et al. (2010) Humans possess two mitochondrial ferredoxins, Fdx1 and Fdx2, with distinct roles in steroidogenesis, heme, and Fe/S cluster biosynthesis. *PNAS* 107 (26) 11775-11780
- (4) Hausman A, et al. (2005) The eukaryotic P loop NTPase Nbp35: an essential component of the cytosolic and nuclear iron-sulfur protein assembly machinery. *PNAS* 102(9): 3266-3271
- (5) Netz DJ, et al. (2012) A bridging [4Fe-4S] cluster and nucleotide binding are essential for function of the Cfd1-Nbp35 complex as a scaffold in Fe-S protein maturation. *J Biol Chem* (287):15.
- (6) Kispal G, et al. (2005) Biogenesis of cytosolic ribosomes requires the essential iron-sulphur protein Rli1p and mitochondria. *EMBO J* 24(3):589-98



**Table S3.** List of primers used in this study

| PRIMER NAME | SEQUENCE                              | COMMENTS                           |
|-------------|---------------------------------------|------------------------------------|
| OLSG-35     | ACGGCTAGCGTAAAACGACGGCCAGT            |                                    |
| OLSG-36     | ACGGCTAGCAACAGCTATGACCATG             |                                    |
| OLSG-49     | ACGAAGCTTAAGGTGCACGGCCC               |                                    |
| OLSG-50     | CATGAATTCGAATGGCCATGGGAC              |                                    |
| OLSG-54     | CAGCTGGCGAAAGGGGGATGT                 |                                    |
| OLSG-93     | ATGCCCGGGACTTAGAAGAAGAGGTTGG          |                                    |
| OLSG-94     | ATGCCCGGGAATTATAGTTCACITTTCTC         |                                    |
| OLSG-107    | ATGAGGCCTCAATCTATCCCTCTCTCC           |                                    |
| OLSG-112    | ACGGCTAGCGACTCACTATAGGGCG             |                                    |
| OLSG-113    | ACGGCTAGCCACTAGTAACGGCCGC             |                                    |
| OLSG-158    | ATGCCCGGGGGCGGCCAGATTACAAGGATGACGAC   |                                    |
| OLSG-190    | ATGGGTACCACTCGCTATTGTCCAGGCTG         |                                    |
| OLSG-191    | ATGGGTACCGCAACCATGTGATGTGCAA          |                                    |
| OLSG-194    | TAGCCCGGGGGCGGCCAGGTGGCGGTGGCTCTGTGA  |                                    |
| OLSG-195    | ATGGCCGGCCAATCTATCCCTCTCTCCGA         |                                    |
| OLSG-196    | ACGGGGCGCGCTTCCCTTCCCTCAACTCC         |                                    |
| OLSG-197    | ACGGGGCGCGCCTGCTTTTTCTTCTCGTCCA       |                                    |
| OLSG-276    | CAGTCTACCGCGAACTTCGTCAA               |                                    |
| OLSG-277    | TTGGGAAGGGCGATCGGTG                   |                                    |
| OLSG-294    | ATGCCCGGGACTCACTATGATCGAAAAAG         |                                    |
| OLSG-295    | ATCAGGCCTAATGGTCGCTGACATTCTAC         |                                    |
| OLSG-296    | CATTGCAATTGGATCCGGTACCGAGCTCGAGCTC    |                                    |
| OLSG-297    | GGAGCCGAAGCCATTCTCAGGAGAGAATTGAGTG    |                                    |
| OLSG-298    | ATGGGCTTCGGCTCCTGC                    |                                    |
| OLSG-299    | AGGTAATTATAACCCGGGATGGTAATCGCAGTAACGG |                                    |
| OLSG-358    | ATTCTCGAGCATGACCAAGACTCTTGCCAAC       |                                    |
| OLSG-359    | ATTTCTAGAAGCGATGAATCAAAAACCTGC        |                                    |
| OLSG-360    | TTACCCGGGGATCAGATTCGTTTTTCAGC         |                                    |
| OLSG-412    | ACGACTAGTAACTTCGAAGGTGACAAGGC         |                                    |
| OLSG-413    | ATCCCTGCAGGCCAGTCCGTCTTCTGACGCC       |                                    |
| OLSG-414    | ACTTCTAGAGGGCAGATTGGAGATAATGGC        |                                    |
| OLSG-415    | ACTGGATCCGCCGTAATGAGGCTTCCGG          |                                    |
| OLSG-434    | GTCGACAAGGGCGTGGTGGCC                 |                                    |
| OLSG-445    | CGGCCACGTGGCCACTAGTACTTTGATTGACGCA    |                                    |
| OLSG-446    | ACCGGGGCCATTCTGCAGGTAATGAAGCTCTAA     |                                    |
| OLSG-447    | TCCTCTAGAGCATTGTGCATGATTAGAGC         |                                    |
| OLSG-448    | TATGGATCCTTCATCACCAGGATCTCCAC         |                                    |
| OLSG-465    | TGCAGGCTGCGGTCCTTGATTG                |                                    |
| OLSG-542    | TGAGTGAAGTGGCTCATCG                   | <i>TUB2</i> ChIP PRIMER FORWARD    |
| OLSG-543    | AGCAAGCCAAAAACAACACC                  | <i>TUB2</i> ChIP PRIMER REVERSE    |
| OLRF-304    | CGGGATTAACGTGATTGCTT                  | <i>ATM1</i> ChIP PRIMER FORWARD    |
| OLRF-310    | TAGAACGAGGAACGCGCTAT                  | <i>ATM1</i> ChIP PRIMER REVERSE    |
| OLRF-272    | GCACCATACCTTCTACAATGAGC               | <i>ACT1</i> qRT-PCR PRIMER FORWARD |
| OLRF-273    | CAGGAAGCTCGTAAGACTTTTCA               | <i>ACT1</i> qRT-PCR PRIMER REVERSE |
| OLRF-260    | TCATCTGGAGCGTCAAACCTG                 | <i>ATM1</i> qRT-PCR PRIMER FORWARD |
| OLRF-261    | GCCAAATTTCCATGAGAGGA                  | <i>ATM1</i> qRT-PCR PRIMER REVERSE |
| OLRF-350    | TACGAGCGAGGCTCAAGACA                  | <i>MT1</i> qRT-PCR PRIMER FORWARD  |
| OLRF-351    | GGCAGCGCCAGATCCGCTG                   | <i>MT1</i> qRT-PCR PRIMER REVERSE  |
| OLRF-352    | TTCAACCCCAACCAGAAAAG                  | <i>MT2</i> qRT-PCR PRIMER FORWARD  |
| ORF-353     | CACCTTGGCAACCGCATGTG                  | <i>MT2</i> qRT-PCR PRIMER REVERSE  |
| OLSG-361    | CACATTCACCGCTGCCATGGCTG               | <i>CIG1</i> qRT-PCR PRIMER FORWARD |
| OLSG-362    | CTGTTGACCGGGTCGAAACCAC                | <i>CIG1</i> qRT-PCR PRIMER REVERSE |
| OLSG-363    | ATGCCAGACCAGCTCTATCCG                 | <i>SIT1</i> qRT-PCR PRIMER FORWARD |
| OLSG-364    | GACAGAGCCATCCAGGCCATAGC               | <i>SIT1</i> qRT-PCR PRIMER REVERSE |
